# Supplementary material for: Large Scale Process for Low Crystalline MoO3-Carbon Composite Microspheres Prepared by One-Step Spray Pyrolysis for Anodes in Lithium-Ion Batteries
Source: MDPI journal article supplement (doi:10.3390/nano9040539), 2019-04-03
Supplement: s1 [file s1]

Supporting Information

# Large Scale Process for Low Crystalline MoO<sub>3</sub>-Carbon Composite Microspheres Prepared by One-Step Spray Pyrolysis for Anodes in Lithium-Ion Batteries

Jung Sang Cho

Department of Engineering Chemistry, Chungbuk National University, Chungbuk 361-763, Korea;  
jscho@cbnu.ac.kr; Tel.: +82-43-261-2489; Fax: +82-43-262-2380

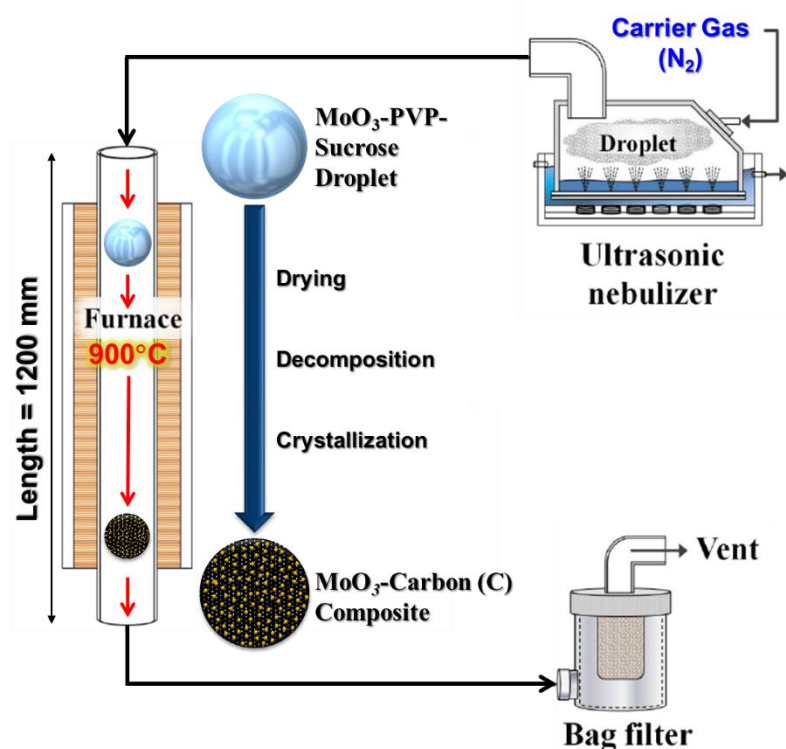

**Figure S1.** Schematic diagram of spray pyrolysis system applied in the preparation of MoO<sub>3</sub>/C composite microspheres.

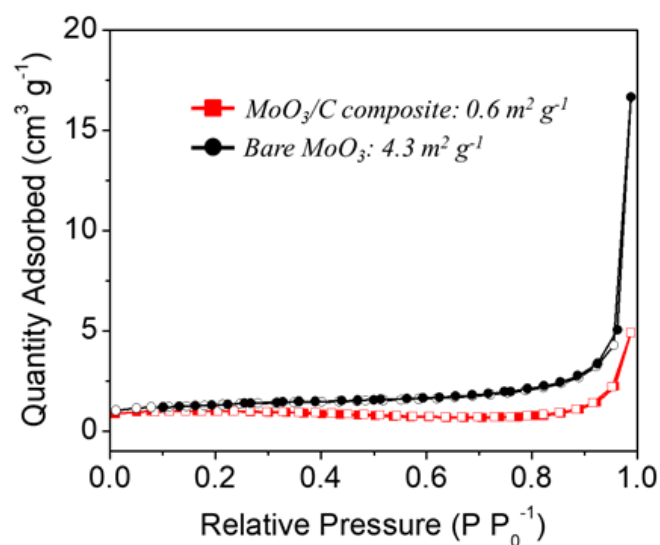

**Figure S2.** N<sub>2</sub> adsorption-desorption isotherms measured at 77 K for the MoO<sub>3</sub>/C composite microspheres and bare MoO<sub>3</sub> powders.

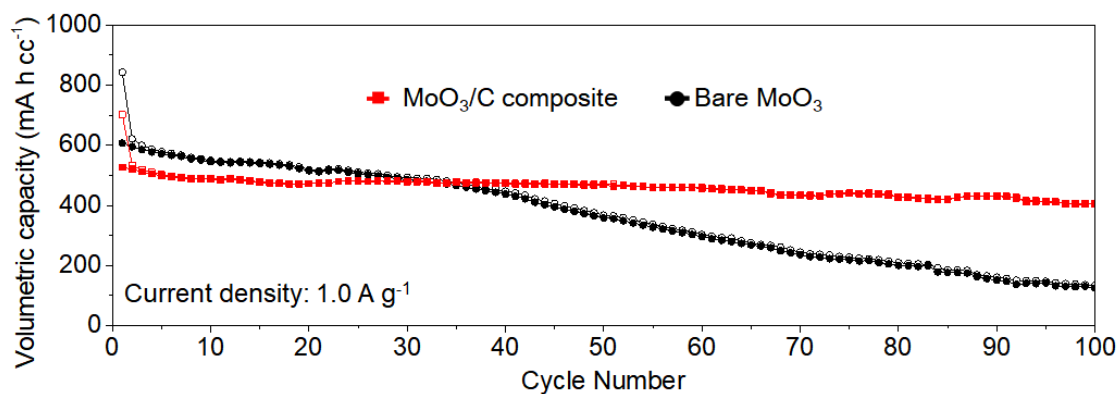

**Figure S3.** Cycle properties of the MoO<sub>3</sub>/C composite microspheres and the bare MoO<sub>3</sub> powders.

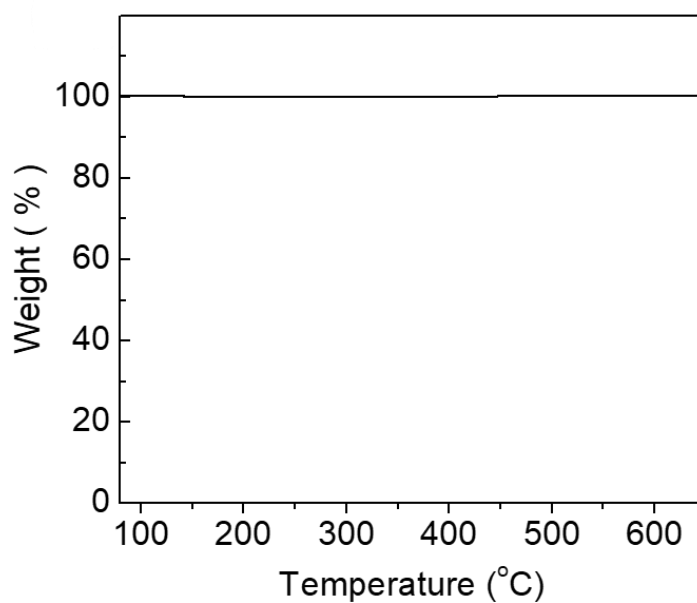

**Figure S4.** TGA curve of the bare MoO<sub>3</sub> powders.

**Table S1.** Fitted data obtained from the equivalent circuit for Nyquist plots.

|                                     |                                    | <b>R<sub>f</sub> (Ω)</b> | <b>R<sub>ct</sub> (Ω)</b> |
|-------------------------------------|------------------------------------|--------------------------|---------------------------|
| <b>Fresh cell</b>                   | <b>MoO<sub>3</sub>-C composite</b> | -                        | <b>26</b>                 |
|                                     | <b>Bare MoO<sub>3</sub></b>        | -                        | <b>31</b>                 |
| <b>After 1<sup>st</sup> cycle</b>   | <b>MoO<sub>3</sub>-C composite</b> | <b>3</b>                 | <b>18</b>                 |
|                                     | <b>Bare MoO<sub>3</sub></b>        | <b>5</b>                 | <b>28</b>                 |
| <b>After 100<sup>th</sup> cycle</b> | <b>MoO<sub>3</sub>-C composite</b> | <b>8</b>                 | <b>42</b>                 |
|                                     | <b>Bare MoO<sub>3</sub></b>        | <b>82</b>                | <b>134</b>                |
